# $\alpha_2$ -Adrenergic Receptor and Isoflurane Modulation of Presynaptic $\text{Ca}^{2+}$ Influx and Exocytosis in Hippocampal Neurons

Masato Hara, M.D., Ph.D., Zhen-Yu Zhou, M.D., Ph.D., Hugh C. Hemmings, Jr., M.D., Ph.D.

## ABSTRACT

**Background:** Evidence indicates that the anesthetic-sparing effects of  $\alpha_2$ -adrenergic receptor (AR) agonists involve  $\alpha_{2A}$ -AR heteroreceptors on nonadrenergic neurons. Since volatile anesthetics inhibit neurotransmitter release by reducing synaptic vesicle (SV) exocytosis, the authors hypothesized that  $\alpha_2$ -AR agonists inhibit nonadrenergic SV exocytosis and thereby potentiate presynaptic inhibition of exocytosis by isoflurane.

**Methods:** Quantitative imaging of fluorescent biosensors of action potential-evoked SV exocytosis (synaptophysin-pHluorin) and  $\text{Ca}^{2+}$  influx (GCaMP6) were used to characterize presynaptic actions of the clinically used  $\alpha_2$ -AR agonists dexmedetomidine and clonidine, and their interaction with isoflurane, in cultured rat hippocampal neurons.

**Results:** Dexmedetomidine (0.1  $\mu\text{M}$ ,  $n = 10$ ) or clonidine (0.5  $\mu\text{M}$ ,  $n = 8$ ) inhibited action potential-evoked exocytosis ( $54 \pm 5\%$  and  $59 \pm 8\%$  of control, respectively;  $P < 0.001$ ). Effects on exocytosis were blocked by the subtype-nonspecific  $\alpha_2$ -AR antagonist atipamezole or the  $\alpha_{2A}$ -AR-selective antagonist BRL 44408 but not by the  $\alpha_{2C}$ -AR-selective antagonist JP 1302. Dexmedetomidine inhibited exocytosis and presynaptic  $\text{Ca}^{2+}$  influx without affecting  $\text{Ca}^{2+}$  coupling to exocytosis, consistent with an effect upstream of  $\text{Ca}^{2+}$ -exocytosis coupling. Exocytosis coupled to both N-type and P/Q-type  $\text{Ca}^{2+}$  channels was inhibited by dexmedetomidine or clonidine. Dexmedetomidine potentiated inhibition of exocytosis by 0.7 mM isoflurane (to  $42 \pm 5\%$ , compared to  $63 \pm 8\%$  for isoflurane alone;  $P < 0.05$ ).

**Conclusions:** Hippocampal SV exocytosis is inhibited by  $\alpha_{2A}$ -AR activation in proportion to reduced  $\text{Ca}^{2+}$  entry. These effects are additive with those of isoflurane, consistent with a role for  $\alpha_{2A}$ -AR presynaptic heteroreceptor inhibition of nonadrenergic synaptic transmission in the anesthetic-sparing effects of  $\alpha_{2A}$ -AR agonists. (**ANESTHESIOLOGY 2016; 125:535-46**)

GENERAL anesthesia is a reversible drug-induced state of neurologic unresponsiveness characterized by amnesia, unconsciousness, and immobility in response to painful stimuli. The molecular and cellular mechanisms that produce these key pharmacologic features are poorly understood.<sup>1</sup> All general anesthetics modulate synaptic transmission and neuronal excitability, altering the balance between excitation and inhibition and reducing connectivity in central nervous system networks.<sup>2,3</sup> The principal molecular targets underlying these cellular and network effects include both ligand-gated and voltage-gated ion channels.<sup>1,4</sup> Dexmedetomidine and clonidine are not general anesthetics themselves but produce sedative-hypnotic and anesthetic-sparing effects through activation of G protein-coupled  $\alpha_{2A}$ -adrenergic receptors ( $\alpha_{2A}$ -ARs).<sup>5,6</sup> The downstream targets coupled to  $\alpha_{2A}$ -AR activation that contribute to their anesthetic-sparing effects are incompletely characterized.

A well-described effect of  $\alpha_2$ -AR agonists is suppression of norepinephrine release from noradrenergic locus coeruleus (LC) neurons through inhibitory autoreceptor activation.<sup>7</sup> This mechanism was originally suggested to underlie the sedative action of dexmedetomidine.<sup>8</sup> However, genetic analysis of the functional roles of  $\alpha_2$ -AR subtypes in adrenergic and nonadrenergic cells indicates that the sedative-hypnotic

## What We Already Know about This Topic

- Volatile anesthetics inhibit neurotransmitter release by reducing synaptic vesicle exocytosis
- The authors tested the hypothesis that  $\alpha_2$ -adrenoceptor agonists potentiate presynaptic inhibition of nonadrenergic synaptic vesicle exocytosis by isoflurane

## What This Article Tells Us That Is New

- Using quantitative imaging of fluorescent biosensors of action potential-evoked synaptic vesicle exocytosis (synaptophysin-pHluorin) and  $\text{Ca}^{2+}$  influx (GCaMP6) in cultured rat hippocampal neurons, it was found that synaptic vesicle exocytosis was inhibited by both dexmedetomidine and clonidine in proportion to reduced  $\text{Ca}^{2+}$  entry
- These effects were specifically due to activation of  $\alpha_{2A}$ -adrenoceptors and were additive with inhibition of release by isoflurane

effects of  $\alpha_2$ -AR agonists are mediated not by presynaptic  $\alpha_{2A}$ -AR autoreceptors but rather by  $\alpha_{2A}$ -AR heteroreceptors on nonadrenergic neurons.<sup>9</sup> Moreover, the cellular locations and actions of these critical nonadrenergic neuronal  $\alpha_{2A}$ -ARs responsible for the sedative and anesthetic-sparing actions of  $\alpha_2$ -AR agonists are unknown.<sup>10</sup>

Volatile anesthetics are known to inhibit the release of multiple neurotransmitters through direct presynaptic

Submitted for publication January 8, 2016. Accepted for publication May 23, 2016. From the Departments of Anesthesiology (M.H., Z.-Y.Z., H.C.H.) and Pharmacology (H.C.H.), Weill Cornell Medical College, New York, New York, USA; and <sup>3</sup>Department of Anesthesiology, Kurume University School of Medicine, Kurume, Fukuoka, Japan (M.H.).

Copyright © 2016, the American Society of Anesthesiologists, Inc. Wolters Kluwer Health, Inc. All Rights Reserved. Anesthesiology 2016; 125:535-46

mechanisms, including more potent inhibition of the release of glutamate, the principal excitatory neurotransmitter in the central nervous system, compared to other neurotransmitters.<sup>11–14</sup> Since  $\alpha_2$ -AR agonists reduce requirements for general anesthetics,<sup>15</sup> we hypothesized that they also affect nonadrenergic synaptic transmission through presynaptic effects on evoked neurotransmitter release. Reduced excitatory transmission resulting in alteration of the balance between neuronal excitation and inhibition has been implicated in the effects of volatile anesthetics<sup>1,16</sup> and provides a plausible mechanism for the well-known pharmacologic interaction underlying the anesthetic-sparing effects of  $\alpha_2$ -AR agonists.

$\alpha_{2A}$ -ARs are expressed widely in neurons throughout the central nervous system,<sup>17,18</sup> primarily at presynaptic rather than postsynaptic sites,<sup>9,19</sup> consistent with a role for presynaptic  $\alpha_{2A}$ -ARs on nonadrenergic neurons in their neuropharmacologic effects. Suppression of both excitatory and inhibitory neurotransmission by  $\alpha_2$ -AR agonists has been shown by electrophysiologic recordings in brain slices,<sup>20,21</sup> but since neurotransmitter release was not measured directly, these synaptic effects could be mediated postsynaptically or indirectly through intrinsic noradrenergic afferents rather than by direct presynaptic actions on heterosynaptic  $\alpha_{2A}$ -ARs. We, therefore, studied the effects and  $\alpha_2$ -AR receptor subtype specificity of the clinically used  $\alpha_2$ -AR agonists dexmedetomidine and clonidine and their pharmacodynamic interaction with isoflurane on action potential (AP)-evoked synaptic vesicle (SV) exocytosis and presynaptic  $\text{Ca}^{2+}$  influx in cultured rat hippocampal neurons using quantitative biosensor fluorescence live-cell imaging approaches.<sup>22–24</sup>

## Materials and Methods

### Reagents and Solutions

Dexmedetomidine, clonidine, atipamezole, BRL 44408, and JP 1302 were purchased from Tocris Bioscience (United Kingdom);  $\omega$ -conotoxin GIVA and  $\omega$ -agatoxin IVA from Alomone Labs (Israel); bafilomycin A1 from Calbiochem (USA); and isoflurane from Abbott (USA). All other reagents were purchased from Sigma-Aldrich (USA). The synaptophysin-pHluorin (syn-pH) construct was kindly provided by Yongling Zhu (Northwestern University, USA), and the GCaMP6 construct was kindly provided by Loren L. Looger (Janelia Farm Research Campus, Howard Hughes Medical Institute, Ashburn, Virginia).<sup>24</sup>

Isoflurane-saturated stock solutions (approximately 12 mM) were prepared and diluted daily into gastight glass syringes, from which a sample was taken for determination of aqueous isoflurane concentration. Solutions were perfused focally onto imaged cells *via* a 150- $\mu\text{m}$ -diameter perfusion pipette using polytetrafluoroethylene tubing to minimize isoflurane loss. Concentrations used corresponded to 1 to 3 times the minimum alveolar concentration in rats corrected

to 30°C (0.35 mM).<sup>25</sup> Perfusate samples were taken at the tip of the perfusion manifold to determine delivered isoflurane concentrations and reflected approximately 10% loss from the syringe to the pipette tip. Isoflurane concentrations were determined by extraction into *n*-heptane (1:1 v/v) followed by analysis using a Shimadzu GC-2010 Plus gas chromatograph (Japan) with external standard calibration.<sup>26</sup>

### Hippocampal Neuron Culture and Transfection

Experiments were approved by the Weill Cornell Medical College Institutional Animal Care and Use Committee and conformed to National Institutes of Health Guidelines for the Care and Use of Animals. Hippocampal CA3–CA1 regions were dissected from neonatal Sprague-Dawley rats (1 to 3 days old, male and female), and cells were dissociated and plated as described.<sup>22</sup> Neurons were transfected on days 7 to 8 *in vitro* with the syn-pH or GCaMP6 construct using the  $\text{Ca}_2\text{PO}_4$  method, and imaging experiments were conducted on days 14 to 21 *in vitro*.<sup>23</sup> Randomization was not used to assign experimental conditions as the pharmacologic approaches used required specific sequential applications of drugs; therefore, the experimenter was not blinded to the conditions. Rat pups born from at least three different parents were used for each set of experiments.

### Synaptic Vesicle Exocytosis

Synaptophysin-pHluorin (syn-pH), a fusion protein of the engineered, pH-sensitive green fluorescent protein pHluorin fused to the luminal N-terminal tail of the synaptic vesicular protein synaptophysin, was used as an optical biosensor of SV exocytosis.<sup>22,27</sup> Changes in fluorescence ( $\Delta F$ ) during electrical stimulation of AP firing reflect alkalization of pHluorin due to exocytosis, while changes during the poststimulus period reflect reacidification after endocytosis.<sup>22</sup> The transfection method yielded only several transfected cells per dish due to the low transfection efficiency such that boutons from single cells could be identified and imaged without interference from other neurons.

Live-cell imaging was performed at  $30.0^\circ \pm 0.2^\circ\text{C}$  with continuous superperfusion at  $0.27 \text{ ml min}^{-1}$  with Tyrode solution containing (in mM) 119 NaCl, 2.5 KCl, 2  $\text{CaCl}_2$ , 2  $\text{MgCl}_2$ , 25 HEPES buffered to pH 7.4, and 30 glucose, with 10  $\mu\text{M}$  6-cyano-7-nitroquinoxaline-2,3-dione (CNQX) and 50  $\mu\text{M}$  D,L-2-amino-5-phosphonovaleric acid (AP5) included to block excitatory synaptic transmission and recurrent excitation. Fluorescence images were acquired with an Andor iXon1 camera (model DU-897E-BV; United Kingdom) with a solid-state, diode-pumped 488-nm laser shuttered using acousto-optic modulation. Data were acquired at 10 or 100 Hz by integrating for 30 or 9.74 ms in frame transfer mode and restricting imaging to a subarea of the charge-coupled device chip. The  $\Delta F$  for exocytosis in response to AP trains was defined as the difference between the average of 2 to 10 frames before and after the stimulus.

APs were evoked by stimulation with 1-ms current pulses yielding fields of approximately  $10\text{ V cm}^{-1}$  using platinum-iridium electrodes. Cells were allowed to rest approximately 60 s between 20 Hz AP trains and at least 5 min between 10 Hz AP trains. Experiments were followed by a maximally depleting stimulus (1,200 APs at 10 Hz) in the presence of the v-ATPase inhibitor bafilomycin A1 ( $0.5\ \mu\text{M}$ ), which prevents SV reacidification after exocytosis, to determine total recycling pool (TRP) size and then by perfusion with  $50\ \text{mM NH}_4\text{Cl}$  (substituted for  $50\ \text{mM}$

NaCl and buffered to pH 7.4) to define the total pool (TP) by alkalization of all vesicles. Fluorescence measurements are expressed as a fraction of the TP (fig. 1).<sup>23</sup>

### Calcium Measurements

GCaMP6 was used to measure intracellular  $\text{Ca}^{2+}$  ( $[\text{Ca}^{2+}]_i$ ) in hippocampal neuron boutons stimulated by field potential-generated APs in the presence of  $2\ \text{mM}$  extracellular  $\text{Ca}^{2+}$  ( $[\text{Ca}^{2+}]_o$ ).<sup>24</sup> GCaMP6 peak fluorescence ( $\Delta F$ ) for each stimulus was determined by averaging the two highest points after

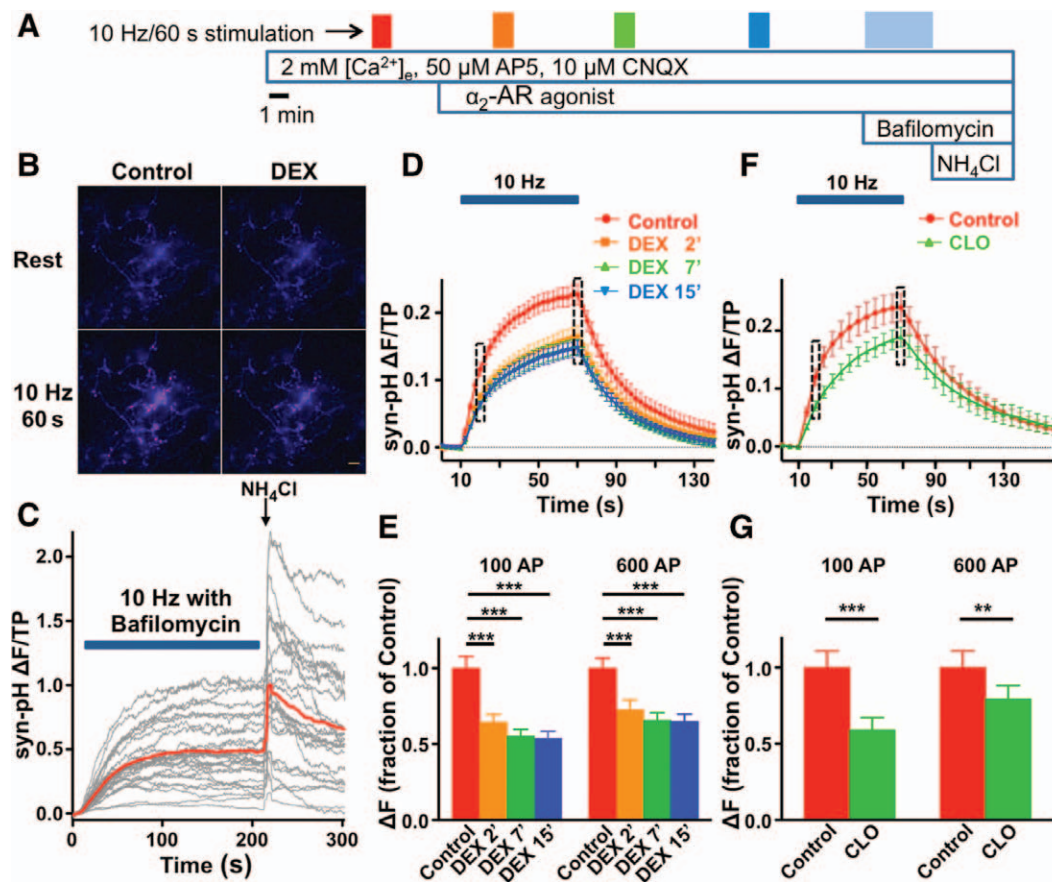

**Fig. 1.**  $\alpha_2$ -Adrenergic receptor agonists inhibit action potential (AP)-evoked synaptic vesicle (SV) exocytosis from hippocampal neurons. (A) Schematic diagram of protocol to test the effects of  $\alpha_2$ -adrenergic receptor (AR) agonists on SV exocytosis. Filled boxes indicate electrical stimulation at 10 Hz for 60 s (600 APs), followed by three cycles of 600 AP stimuli in the presence of the  $\alpha_2$ -AR agonists  $0.1\ \mu\text{M}$  dexmedetomidine (DEX) or  $0.5\ \mu\text{M}$  clonidine (CLO) with at least 5-min rest between each stimulation. (B) Representative fluorescence images of synaptophysin-pHluorin (syn-pH) expressing boutons at rest (upper panels) and after 600 APs (lower panels) for control (left) and DEX-treated neurons (right). Scale bar =  $10\ \mu\text{m}$ . (C) Representative traces (gray) and average (red) of syn-pH fluorescence to determine total recycling pool (TRP) size and total pool (TP) obtained from 26 boutons analyzed from a single neuron were stimulated continuously at 10 Hz (bar indicates electrical stimulation) in the presence of  $0.5\ \mu\text{M}$  bafilomycin A1 to prevent SV reacidification. The plateau in fluorescence reflects TRP. Vesicle alkalization with  $50\ \text{mM NH}_4\text{Cl}$  revealed the size of the TP. (D) Time series of fluorescence changes, shown every 2.5 s, for 600 APs in the absence (control; CTL) or presence of  $0.1\ \mu\text{M}$  DEX (after 2, 7, and 15 min of drug exposure). Fluorescence intensities were normalized to the subsequent  $\text{NH}_4\text{Cl}$  response (TP). Bar indicates electrical stimulation. (E) Mean values of peak syn-pH response amplitude at 10 s (100 APs) and 60 s (600 APs) of stimulation (boxed areas in D), normalized to control values for each time point. Data are expressed as mean  $\pm$  SEM.  $***P < 0.001$  by one-way repeated measures ANOVA followed by Tukey multiple comparison test. (F) Time series of fluorescence changes, shown every 5 s, for 600 APs in the absence or presence of  $0.5\ \mu\text{M}$  CLO (after 7-min exposure). (G) Mean values of peak syn-pH response amplitude at 10 s (100 AP) and 60 s (600 AP) of stimulation (boxed areas in F), normalized to control values for each time point. Data are expressed as mean  $\pm$  SEM.  $**P < 0.01$ ,  $***P < 0.001$  compared to respective control by two-tailed paired  $t$  test. CNQX = 6-cyano-7-nitroquinoline-2,3-dione.



stimulation and subtracting the average baseline of 10 points before AP stimulation.

### Image and Statistical Analysis

Boutons were selected for analysis by demonstrating their responsiveness to test applications of  $\text{NH}_4\text{Cl}$ . Peak amplitude at 100 APs was selected at 10 s in the middle of a 10-Hz 20-s stimulation. Bafilomycin A1 and  $\text{NH}_4\text{Cl}$  effects were analyzed as mean plateau values. Images were analyzed in ImageJ (National Institutes of Health, USA; <http://rsb.info.nih.gov/ij>) with a custom plugin (<http://rsb.info.nih.gov/ij/plugins/time-series.html>). Silent boutons, defined as those where the response to 100 APs was smaller than the SD of the baseline before stimulation ( $\Delta F_{100} = \sigma \leq 0$ ), were excluded from analysis; less than 10% of boutons did not respond to stimulation and were excluded from analysis. Based on previous studies,<sup>13,14,22,23</sup> sample sizes greater than or equal to 5 were used. Data are shown as mean  $\pm$  SEM. ANOVA with Tukey or Bonferroni *post hoc* tests, two-tailed Student's *t* test ( $P < 0.05$ ), and 95% CIs were used for testing statistical significance. GraphPad Prism 6 (GraphPad Software, Inc., USA) was used for statistical analysis.

## Results

### $\alpha_2$ -AR Agonists Inhibit Synaptic Vesicle Exocytosis

The effects of  $\alpha_2$ -AR agonists on SV exocytosis were studied using live-cell imaging of cultured rat hippocampal neurons. Exocytosis evoked by 60 s of field electrical stimulation at a frequency of 10 Hz across 25 to 40 boutons led to a rapid increase in fluorescence due to exocytosis and externalization of syn-pH (fig. 1B). Blocking reacidification with bafilomycin A1 led to a plateau in fluorescence at approximately 200 s identifying the TRP size (fig. 1C). Signals were normalized at each bouton to the TP obtained by rapid alkalization of the entire labeled vesicle pool using  $\text{NH}_4\text{Cl}$  (fig. 1C), thus correcting signals for variations in syn-pH expression levels. The time course of the fluorescence change during a train of 600 APs averaged over a population of individual boutons from a single transfected neuron is shown in fig. 1D. Fluorescence reached a peak that decayed after the stimulus period due to endocytosis and SV reacidification (fig. 1D).

AP-evoked exocytosis was inhibited by the clinically used sedative  $\alpha_2$ -AR agonists dexmedetomidine (0.1  $\mu\text{M}$ ; fig. 1, B, D, and E) or clonidine (0.5  $\mu\text{M}$ ; fig. 1, F and G); these concentrations are known to be effective *in vitro*.<sup>21,28</sup> The more selective  $\alpha_2$ -AR agonist dexmedetomidine applied for 15 min reduced peak exocytosis elicited by 100 APs to  $54 \pm 5\%$  of control (95% CI, 0.42 to 0.65; fig. 1E), with no significant difference in effect between 2 and 15 min of dexmedetomidine application, indicating a rapid onset of inhibition. The less selective partial  $\alpha_2$ -AR agonist clonidine inhibited peak SV exocytosis to  $59 \pm 8\%$  of control (95% CI, 0.40 to 0.78; fig. 1G). The degree of inhibition of SV exocytosis was less at the end of 60 s of stimulation (600 AP)

compared to 10 s of stimulation (100 AP) for dexmedetomidine (95% CI,  $-0.21$  to  $-0.01$ ;  $P = 0.04$  by two-tailed paired *t* test,  $n = 10$ ) or clonidine (95% CI,  $-0.36$  to  $-0.05$ ;  $P = 0.016$  by two-tailed paired *t* test,  $n = 8$ ), indicating that inhibition can be partially overcome by a longer stimulation period (fig. 1, E and G). During prolonged stimulation in the presence of bafilomycin A1, neither dexmedetomidine ( $0.59 \pm 0.03$ ; 95% CI, 0.51 to 0.67;  $P = 0.95$ ;  $n = 10$ ) nor clonidine ( $0.61 \pm 0.03$ ; 95% CI, 0.54 to 0.68;  $P = 0.76$ ;  $n = 8$ ) affected TRP size as a fraction of TP compared to control ( $0.60 \pm 0.03$ ; 95% CI, 0.53 to 0.66;  $n = 11$ , by two-tailed unpaired *t* test; data not shown).

### Inhibition of Exocytosis Is Mediated by the $\alpha_{2A}$ -AR Subtype

There are three major  $\alpha_2$ -AR receptor subtypes:  $\alpha_{2A}$ ,  $\alpha_{2B}$ , and  $\alpha_{2C}$ .<sup>29</sup> The specific subtype mediating inhibition of SV exocytosis by dexmedetomidine and clonidine was examined using subtype-selective antagonists. Dexmedetomidine (0.1  $\mu\text{M}$ ) reduced peak exocytosis elicited by 100 AP to  $57 \pm 6\%$  of control (95% CI, 0.43 to 0.71;  $n = 9$ ; fig. 2A). The nonselective  $\alpha_2$ -AR antagonist atipamezole abolished inhibition of SV exocytosis by dexmedetomidine, indicating a specific  $\alpha_2$ -AR receptor-mediated mechanism ( $n = 7$ ; fig. 2B). Treatment with the  $\alpha_{2A}$ -AR-selective antagonist BRL 44408 (1  $\mu\text{M}$ ) also blocked inhibition by dexmedetomidine ( $n = 8$ ; fig. 2C), while the  $\alpha_{2C}$ -AR-selective antagonist JP 1302 (3  $\mu\text{M}$ ) had no effect on inhibition of exocytosis by dexmedetomidine ( $n = 7$ ; fig. 2D). Similar receptor subtype selectivity was observed for clonidine (data not shown). These findings indicate that dexmedetomidine and clonidine inhibit SV exocytosis exclusively through interaction with  $\alpha_{2A}$ -ARs.

The effects of dexmedetomidine and clonidine on exocytosis evoked by increasing numbers of APs were also investigated (fig. 3A). Peak exocytosis increased incrementally from 1 to 20 AP stimuli. The degree of inhibition by dexmedetomidine was comparable across this range of stimuli (57 to 60% of control;  $n = 7$ ; fig. 3B), with inhibition to  $60 \pm 6\%$  of control at 20 APs (95% CI, 0.35 to 0.80). Similar results were observed for 0.5  $\mu\text{M}$  clonidine (58 to 65% of control;  $n = 9$ ; data not shown).

### $\alpha_2$ -AR Agonists Inhibit Exocytosis by Reducing $\text{Ca}^{2+}$ Influx

Increases in  $[\text{Ca}^{2+}]_i$  were measured in hippocampal boutons using the optogenetic fluorescent reporter GCaMP6 as an indicator of presynaptic  $\text{Ca}^{2+}$  influx.<sup>24</sup> Peak  $[\text{Ca}^{2+}]_i$  increased incrementally from 1 to 20 AP stimuli (fig. 3C). The degree of inhibition by dexmedetomidine was comparable across this range of stimuli (55 to 62% of control;  $n = 6$ ; fig. 3D), with  $62 \pm 3\%$  of control at 20 APs (95% CI, 0.48 to 0.78) comparable to the degree of inhibition of SV exocytosis. Similar results were observed for 0.5  $\mu\text{M}$  clonidine (63 to 74% of control;  $n = 8$ ; data not shown).

Correlation between AP-evoked SV exocytosis and  $\text{Ca}^{2+}$  influx was measured over a range of AP stimuli to quantify

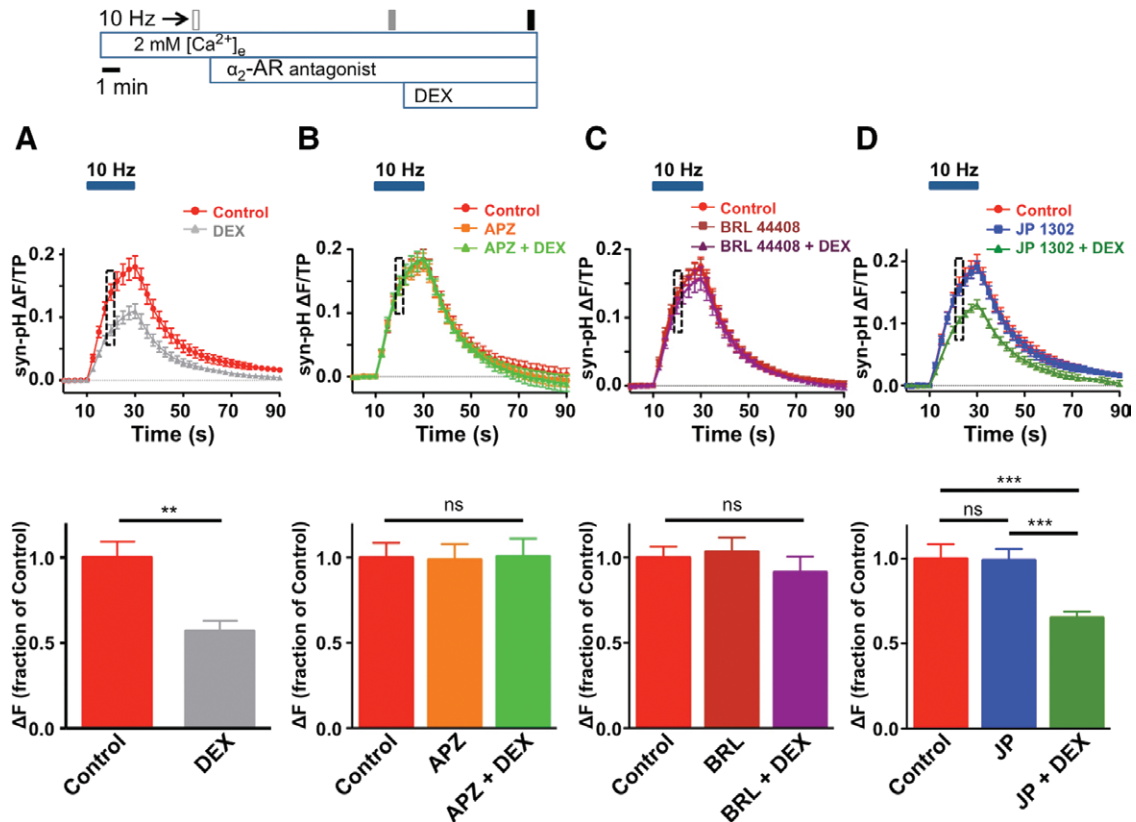

**Fig. 2.** Effects of  $\alpha_2$ -adrenergic receptor (AR) antagonists on dexmedetomidine (DEX) inhibition of synaptic vesicle (SV) exocytosis. (Top) Schematic diagram of protocol to test the effect of DEX on synaptophysin-pHluorin (syn-pH) fluorescence in the presence of  $\alpha_2$ -AR antagonists. Filled boxes indicate electrical stimulation at 10 Hz for 20 sec. (A, Top) Time series of fluorescence changes in the absence (control; CTL) or presence of DEX applied for 7 min, shown every 2.5 s, normalized to total pool (TP) before and after stimulation (horizontal bar). (Bottom) Mean effect of 0.1  $\mu$ M DEX on SV exocytosis at 10 s of stimulation (DEX  $57 \pm 6\%$  of control). Data are expressed as mean  $\pm$  SEM.  $^{**}P < 0.01$  by two-tailed paired *t* test ( $n = 9$ ). (B–D) Effects of  $\alpha_2$ -AR antagonists on action potential (AP)-evoked SV exocytosis at 10 s of stimulation (boxes). (Top) Fluorescence changes ( $\Delta F$ ) with time before and after stimulation. Fluorescence intensities normalized to TP, with data shown every 2.5 s. (Bottom)  $\Delta F$  at 10 s of stimulation. Data are expressed as mean  $\pm$  SEM.  $^{***}P < 0.001$ ; ns, not significant by one-way repeated measures ANOVA followed by Tukey multiple comparison test.

the efficiency of exocytosis at different degrees of  $\text{Ca}^{2+}$  influx ( $\text{Ca}^{2+}$ -exocytosis coupling). The relationship between paired exocytosis- $\text{Ca}^{2+}$  influx data for dexmedetomidine overlapped control data (fig. 4), confirming that the effect of dexmedetomidine on SV exocytosis is directly proportional to reduction in  $\text{Ca}^{2+}$  influx with no measurable effect on the  $\text{Ca}^{2+}$  sensitivity of exocytosis.

While N-type, voltage-gated  $\text{Ca}^{2+}$  channels (VGCCs) are closely coupled to depolarization-evoked release of norepinephrine in sympathetic neurons,<sup>30,31</sup> SV exocytosis in nonadrenergic neurons involves contributions from both N- and P/Q-type VGCCs.<sup>32–35</sup> We used VGCC subtype-specific peptide neurotoxins to evaluate the roles of N- and P/Q-type VGCCs in the inhibitory effects of dexmedetomidine on hippocampal SV exocytosis (fig. 5). The specific N-type VGCC blocker  $\omega$ -conotoxin GIVA inhibited exocytosis to  $62 \pm 9\%$  of control (95% CI, 0.40 to 0.83) after 10 s of 10-Hz stimulation at 2 mM  $[\text{Ca}^{2+}]_e$ . Treatment with dexmedetomidine further inhibited exocytosis

to  $47 \pm 10\%$  of control (95% CI, 0.22 to 0.72), consistent with an effect of dexmedetomidine on exocytosis mediated by P/Q-type channels ( $n = 7$ ; fig. 5A). The specific P/Q-type VGCC toxin  $\omega$ -agatoxin IVA inhibited SV exocytosis to  $53 \pm 10\%$  of control (95% CI, 0.29 to 0.78). Treatment with dexmedetomidine further inhibited exocytosis to  $33 \pm 7\%$  of control (95% CI, 0.17 to 0.49), consistent with an effect of dexmedetomidine on exocytosis mediated by uninhibited N-type channels as well ( $n = 8$ ; fig. 5B). Thus, dexmedetomidine inhibits exocytosis mediated by the two major presynaptic VGCC subtypes known to be coupled to SV exocytosis in the hippocampus.<sup>32–35</sup> Similar results were observed for 0.5  $\mu$ M clonidine (data not shown).

#### Presynaptic Interaction between Dexmedetomidine and Isoflurane

Clinical features of  $\alpha_2$ -AR agonists include their ability to produce sedation and to increase the potency of general

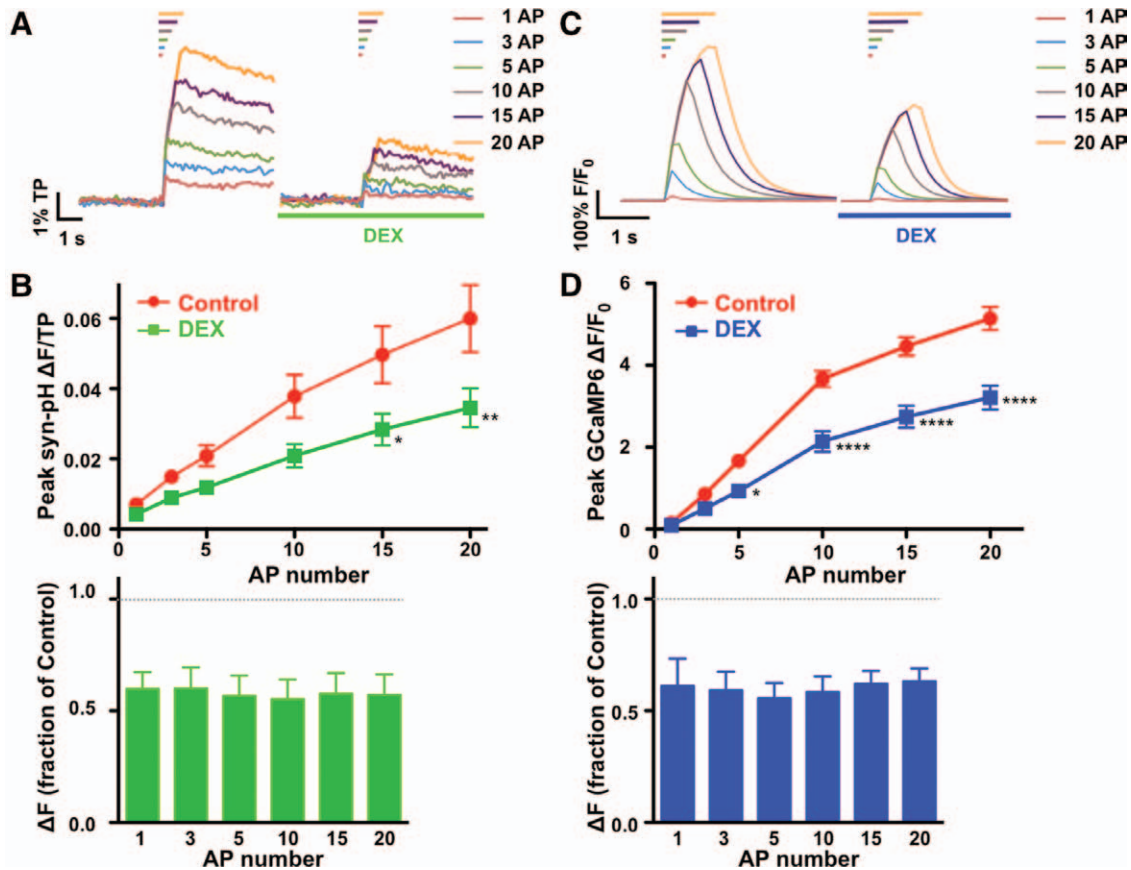

**Fig. 3.** Effect of dexmedetomidine on synaptic vesicle (SV) exocytosis and presynaptic  $\text{Ca}^{2+}$  influx in response to increasing stimuli. (A) Representative synaptophysin-pHluorin (syn-pH) fluorescence responses of a single cell relative to total pool (TP) size evoked by 1, 3, 5, 10, 15, and 20 APs in 2 mM extracellular  $\text{Ca}^{2+}$  ( $[\text{Ca}^{2+}]_o$ ) for control (*left traces*) or in the presence of 0.1  $\mu\text{M}$  dexmedetomidine (DEX) applied for 7 min after control recording (*right traces*). Bars on top indicate duration of 20-Hz stimuli. Each trace was averaged from 1 to 5 trials of 25 to 40 boutons. Scale bar = 1% TP, 1 s. (B) Inhibition of SV exocytosis by DEX. (Top) Peak syn-pH response as a function of action potential (AP) number in the absence (control; CTL) or presence of DEX (0.1  $\mu\text{M}$ ). Data are expressed as mean  $\pm$  SEM. \* $P < 0.05$ , \*\* $P < 0.01$  compared to control by two-way repeated measures ANOVA with Bonferroni *post hoc* test ( $n = 7$ ). (Bottom) Mean peak responses of syn-pH normalized to each control response (no significant differences by one-way ANOVA). (C) Representative GCaMP6 fluorescence responses elicited by 1, 3, 5, 10, 15, and 20 APs in 2 mM  $[\text{Ca}^{2+}]_o$  for control (*left traces*) or in the presence of 0.1  $\mu\text{M}$  DEX (*right traces*) applied for 7 min after control recording. Bars on top indicate duration of 20-Hz AP stimuli. Each trace was averaged from 1 to 5 trials of 25 to 40 boutons. Scale bar = 100%  $\Delta F/F_0$ , 1 s. (D) Inhibition of presynaptic  $\text{Ca}^{2+}$  influx by DEX. (Top) Peaks of GCaMP6 response as a function of AP number (1, 3, 5, 10, 15, and 20 APs) in the absence (control) or presence of DEX (0.1  $\mu\text{M}$ ). Data are expressed as mean  $\pm$  SEM. \* $P < 0.01$ , \*\*\*\* $P < 0.0001$  compared to control by two-way repeated measures ANOVA with Bonferroni *post hoc* test ( $n = 6$ ). (Bottom) Mean peak responses of GCaMP6 normalized to control for each AP number (no significant difference by one-way ANOVA).

anesthetics (anesthetic-sparing effect).<sup>5,6</sup> Since volatile anesthetics such as isoflurane also inhibit SV exocytosis in hippocampal neurons,<sup>1,13,14</sup> we studied the interaction between isoflurane and dexmedetomidine in suppressing exocytosis (fig. 6). Isoflurane inhibited exocytosis in a concentration-dependent manner ( $n = 5$ , fig. 6A): 2 minimum alveolar concentration isoflurane inhibited exocytosis to  $63 \pm 8\%$  of control (95% CI, 0.45 to 0.82); addition of 0.1  $\mu\text{M}$  dexmedetomidine further inhibited exocytosis to  $42 \pm 5\%$  of control (95% CI, 0.31 to 0.53;  $n = 7$ ; fig. 6B), greater than the effect of dexmedetomidine alone ( $54 \pm 5\%$ , 95% CI, 0.42 to 0.65; fig. 1E). The effect of isoflurane did not involve activation of  $\alpha_2$ -ARs as it was not prevented by the subtype

nonselective  $\alpha_2$ -AR antagonist atipamezole, which also had no effect on exocytosis alone ( $n = 7$ ; fig. 6C).

## Discussion

Noradrenergic signaling plays important roles in controlling the endogenous sleep–awake cycle and general anesthesia,<sup>36</sup> but the mechanisms involved in the interaction between general anesthetics and the anesthetic-sparing effects of  $\alpha_2$ -AR agonists are unclear. Potentiation of general anesthesia (anesthetic sparing) is a characteristic neuropharmacologic effect of  $\alpha_{2A}$ -AR agonists.<sup>5,6,37</sup> A well-known action of  $\alpha_{2A}$ -AR agonists is their modulation of norepinephrine release through presynaptic autoreceptors (receptors for the

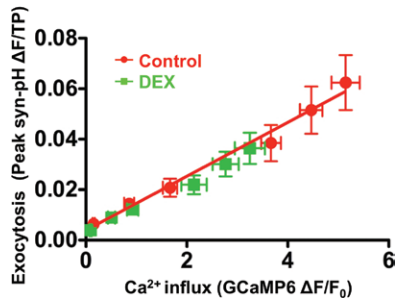

**Fig. 4.** Dexmedetomidine reduces Ca<sup>2+</sup> influx and synaptic vesicle exocytosis without affecting the Ca<sup>2+</sup> sensitivity of exocytosis. Exocytosis plotted as a function of Ca<sup>2+</sup> influx in the absence (control; CTL) or presence of 0.1 μM dexmedetomidine (DEX) combining data for synaptic vesicle (SV) exocytosis (from Fig. 3B) with data for Ca<sup>2+</sup> influx (from Fig. 3D) for 1 to 20 AP stimuli. Data are fitted to a linear model (exocytosis = 0.0107 ± 0.0014 intracellular Ca<sup>2+</sup> [[Ca<sup>2+</sup>]<sub>i</sub>] to 0.00389 ± 0.00458).

same transmitter released by the neuron), but elegant genetic studies targeting cell-specific α<sub>2</sub>-AR receptor expression indicate that classical presynaptic noradrenergic neuron autoreceptor effects are not involved in this anesthetic-sparing action.<sup>9,10</sup> Here, we show that the α<sub>2</sub>-AR agonists dexmedetomidine and clonidine inhibit SV exocytosis and Ca<sup>2+</sup> entry in nonadrenergic hippocampal neurons by a heteroreceptor (receptors for a transmitter not released by the neuron) α<sub>2A</sub>-AR-mediated effect. Moreover, this mechanism is additive with inhibition of SV exocytosis by the volatile anesthetic isoflurane (for summary of possible mechanisms see fig. 7).

Advances in fast microscopic imaging and sensitive fluorescent biosensors allowed us to determine the effects of α<sub>2</sub>-AR agonists on both AP-evoked SV exocytosis<sup>22,23,27</sup> and Ca<sup>2+</sup> influx<sup>24</sup> in intact central nervous system neurons without interference from noradrenergic innervation. We observed that the clinically used α<sub>2</sub>-AR agonists dexmedetomidine

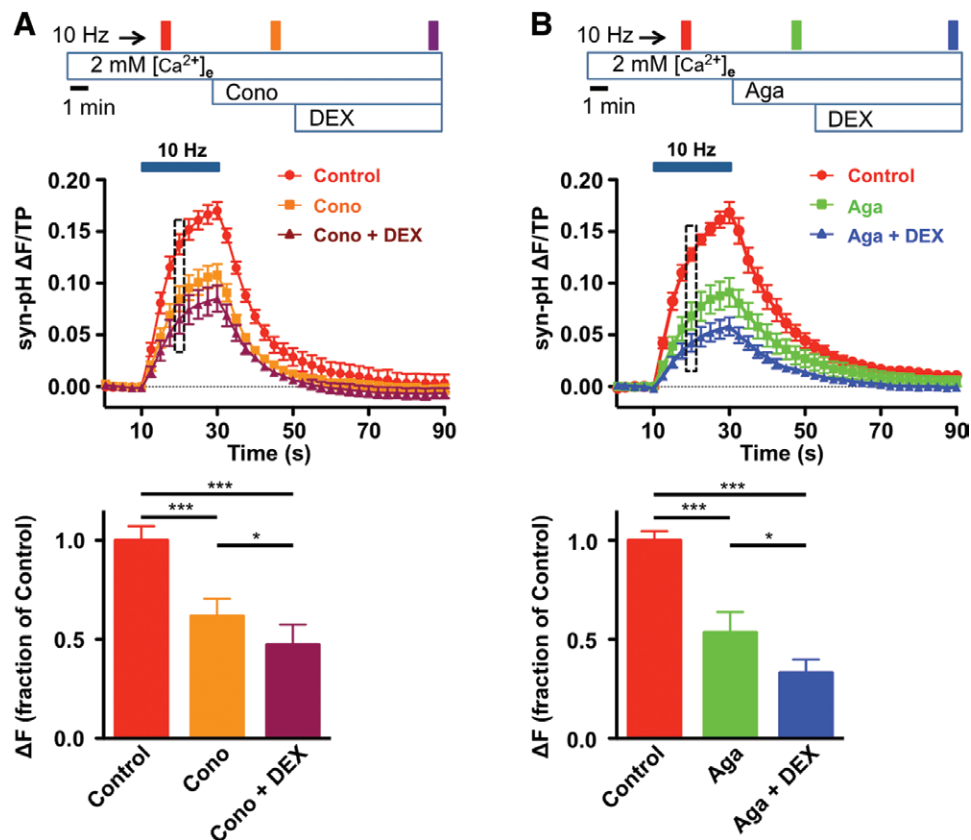

**Fig. 5.** Voltage-gated Ca<sup>2+</sup> channel subtypes contributing to modulation of exocytosis by dexmedetomidine. (A) Effect of 0.1 μM dexmedetomidine (DEX) on exocytosis in the presence of the selective N-type, voltage-gated Ca<sup>2+</sup> channel (VGCC) antagonist ω-conotoxin G1VA (Cono, 1 μM). (Top) Schematic diagram of protocol. (Middle) Time series of fluorescence changes with stimulation at 10 Hz for 20 s. Fluorescence was normalized to TP with data shown every 2.5 s. (Bottom) Mean amplitudes of synaptophysin-pHluorin (syn-pHy) responses at 10 s of 10-Hz stimulation normalized to control (CTL; n = 7). (B) Effect of 0.1 μM DEX in the presence of the specific P/Q-type VGCC antagonist ω-agatoxin IVA (Aga, 0.4 μM). (Top) Schematic diagram of protocol. (Middle) Time series of fluorescence change with 20-s stimulation at 10 Hz. Fluorescence was normalized to TP with data shown every 2.5 s. (Bottom) Mean amplitudes of syn-pH responses at 10 s AP of 10-Hz stimulation normalized to control (n = 8). Data are expressed as mean ± SEM. \*P < 0.05, \*\*\*P < 0.001 by one-way repeated measures ANOVA followed by Tukey multiple comparison test.



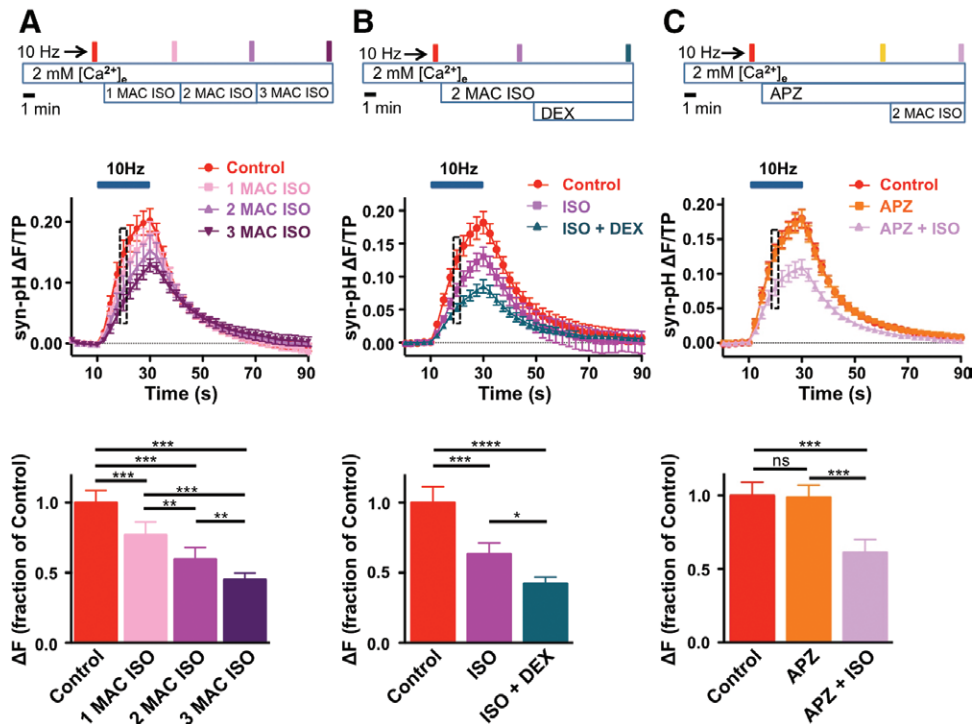

**Fig. 6.** Dexmedetomidine potentiates isoflurane inhibition of action potential (AP)-evoked synaptic vesicle (SV) exocytosis. (A, Top) Schematic diagram of protocol. Filled boxes indicate 20 s of 10-Hz electrical stimulation with sequential exposure to 1 minimum alveolar concentration (MAC, 0.35 mM), 2 MAC, or 3 MAC isoflurane (ISO) for 5 min. (Middle) Time series of synaptophysin-pHluorin (syn-pH) fluorescence changes, shown every 2.5 s, normalized to total pool (TP) before and after 20-s stimulation at 10 Hz. (Bottom) Mean effect of ISO on SV exocytosis at 10 s of stimulation (box) normalized to control (CTL;  $n = 5$ ). (B) Effects of 0.1  $\mu$ M dexmedetomidine (DEX) in the presence of 2 MAC ISO on AP-evoked SV exocytosis at 20 s of 10-Hz stimulation. (Top) Schematic diagram of protocol. (Middle) Time series of syn-pH fluorescence changes, shown every 2.5 s, normalized to TP before and after 20-s stimulation at 10 Hz. (Bottom) Mean effect of ISO and ISO + DEX on SV exocytosis at 10 s of stimulation (box) normalized to control ( $n = 7$ ). (C) Effects of the nonselective  $\alpha_2$ -adrenergic receptor (AR) antagonist atipamezole (APZ; 1  $\mu$ M) on 2 MAC ISO inhibition of AP-evoked SV exocytosis at 10 s of 10-Hz stimulation. (Top) Schematic diagram of protocol. (Middle) Time series of fluorescence changes, shown every 2.5 s, normalized to TP before and after 20-s stimulation at 10 Hz. (Bottom) Mean effect of APZ and APZ + ISO on SV exocytosis at 10 s of stimulation (box) normalized to control ( $n = 7$ ). Data are expressed as mean  $\pm$  SEM. \* $P < 0.05$ , \*\* $P < 0.01$ , \*\*\* $P < 0.001$ , \*\*\*\* $P < 0.0001$ , ns, not significant by one-way repeated measures ANOVA followed by Tukey multiple comparison test.

and clonidine inhibited SV exocytosis from hippocampal neurons through activation of  $\alpha_{2A}$ -ARs to reduce  $Ca^{2+}$  influx mediated by both N-type and P/Q-type VGCCs. Moreover, the highly selective  $\alpha_2$ -AR agonist dexmedetomidine potentiated the presynaptic effects of isoflurane to reduce SV exocytosis. This provides a putative presynaptic target for the anesthetic-sparing properties of  $\alpha_2$ -AR agonists,<sup>6</sup> a clinically relevant pharmacologic interaction that allows reduced dosing of general anesthetics to mitigate their dangerous side-effect profiles.<sup>37</sup>

Contrary to our findings, conventional electrophysiologic studies have not detected dexmedetomidine or medetomidine effects on basal neurotransmission of Schaffer collaterals in rat hippocampus.<sup>38,39</sup> Field excitatory postsynaptic potentials (fEPSPs) are the sum of individual signals from many cells, including inhibitory  $\gamma$ -aminobutyric acid-mediated (GABAergic) interneurons that have extensive arbors that innervate pyramidal

cells. Individual GABAergic interneurons can powerfully inhibit thousands of excitatory pyramidal neurons. Activity of postsynaptic neurons also contributes to fEPSPs such that fEPSPs are affected both by inhibitory signals from GABAergic interneurons and by postsynaptic mechanisms, possibly explaining the insensitivity of the fEPSP to the effects of dexmedetomidine. In contrast, the method we used selectively reports activity from presynaptic boutons of only a single cell, most commonly nonGABAergic neurons as detected by vGAT immunoreactivity.<sup>14</sup> Although we did not routinely determine neuronal phenotype at the time of this study, we did screen 29 of the 96 neurons described here using vGAT-Oyster labeling, and all 29 were negative (*i.e.*, not GABAergic and thus assumed to be glutamatergic; data not shown). Further studies of neurons of defined transmitter phenotype will be necessary to determine whether there are transmitter-specific differences in  $\alpha_{2A}$ -AR modulation of SV exocytosis.



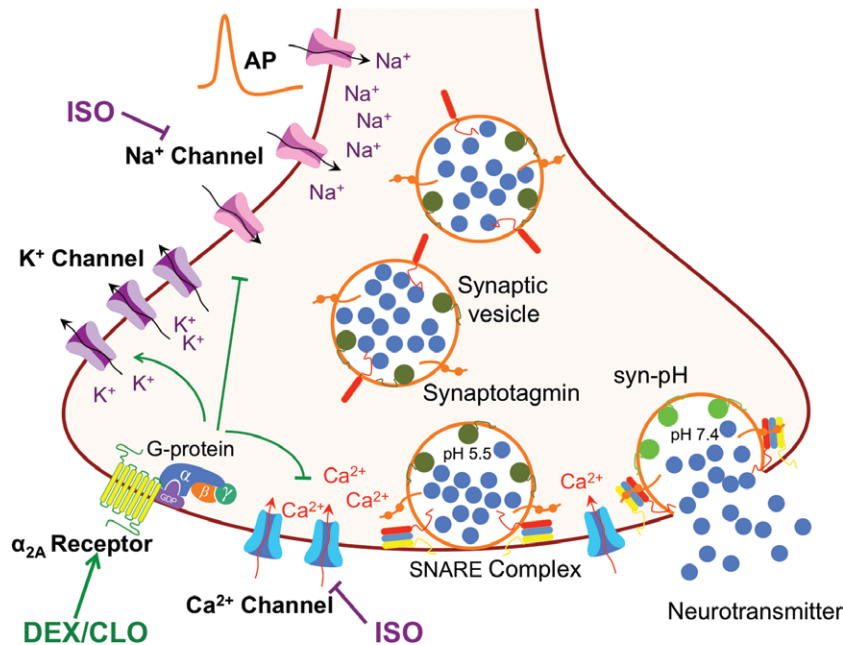

**Fig. 7.** Presynaptic mechanisms relevant to the effects of  $\alpha_2$ -adrenergic receptor (AR) agonists on synaptic vesicle exocytosis. Inhibition by the volatile anesthetic isoflurane (ISO) is due primarily to inhibition of voltage-gated  $\text{Na}^+$  channels ( $\text{Na}_v$ ) rather than direct inhibition of voltage-gated  $\text{Ca}^{2+}$  channels ( $\text{Ca}_v$ ) or soluble N-ethylmaleimide-sensitive factor attachment protein receptor (SNARE) proteins. Effects of  $\alpha_{2A}$ -AR agonists such as dexmedetomidine (DEX) and clonidine (CLO) are mediated by G-protein-coupled receptors, specifically through the  $\text{G}\alpha_{12}$  isoform. The relevant downstream targets of G-protein activation by  $\alpha_{2A}$ -AR are unknown; plausible candidates include activation of  $\text{K}^+$  channels, inhibition of  $\text{Ca}_v$ , and/or by reduced action potential (AP)-induced depolarization through inhibition of  $\text{Na}_v$ . Use of the fluorescent biosensor synaptophysin-pHluorin (syn-pH; green circles) to measure exocytosis is also shown; increased fluorescence is induced by the increase in pH after synaptic vesicle fusion (right).

We have shown previously that isoflurane inhibits SV exocytosis in hippocampal neurons.<sup>13,14</sup> While the effects of dexmedetomidine and isoflurane on exocytosis are additive, their molecular mechanisms are distinct since the isoflurane effect is insensitive to  $\alpha_2$ -AR antagonism. The inhibitory effects of volatile anesthetics on hippocampal exocytosis are thus independent of  $\alpha_2$ -AR-coupled G protein signaling but rather appear to involve primarily direct depression of presynaptic, voltage-gated  $\text{Na}^+$  channels ( $\text{Na}_v$ ) to reduce presynaptic excitability.<sup>13,40</sup> In contrast, the sedative and anesthetic-sparing properties of  $\alpha_2$ -AR agonists are mediated by G protein-coupled receptors, specifically through the  $\text{G}\alpha_{12}$  isoform.<sup>41</sup> The relevant G protein-regulated downstream targets for the presynaptic effects of  $\alpha_2$ -AR agonists on  $\text{Ca}^{2+}$  influx and in turn SV exocytosis remain to be established. Clonidine can inhibit both N- and P/Q-type  $\text{Ca}^{2+}$  currents in mouse amygdala slices, consistent with our findings of effects on both pathways of  $\text{Ca}^{2+}$  entry.<sup>42</sup> Moreover, a recent study shows that dexmedetomidine inhibits  $\text{Na}_v 1.8$  currents in rat dorsal root ganglion neurons by increasing activation threshold and decreasing AP firing, suggesting that  $\alpha_{2A}$ -AR agonists might also affect AP frequency and propagation.<sup>43</sup> These parallel pathways of inhibition result in additive effects of isoflurane and  $\alpha_2$ -AR agonists on both  $\text{Ca}^{2+}$  influx and SV exocytosis, thus providing a plausible cellular mechanism for their pharmacodynamic anesthetic-sparing interactions

*in vivo*.<sup>9,10</sup> Electrophysiological studies or optical measurements of AP waveforms using microbial rhodopsin-based biosensors<sup>44</sup> should further determine directly whether  $\alpha_{2A}$ -AR agonists affect presynaptic AP properties.

The  $\alpha_2$ -ARs were among the first presynaptic receptors identified by their role as autoreceptors coupled to inhibition of norepinephrine release.<sup>29</sup> Previous studies suggested that the sedative and anesthetic-sparing effects of selective  $\alpha_2$ -AR agonists involved reductions in noradrenergic neurotransmission through autoreceptor activation.<sup>45</sup> However, more recent studies have implicated effects of  $\alpha_2$ -AR agonists on nonadrenergic neurons in these actions.<sup>9,46,47</sup> Genetically engineered mice that express  $\alpha_{2A}$ -ARs only in noradrenergic terminals show minimal neurologic effects of the  $\alpha_2$ -AR agonist medetomidine, including loss of righting reflex and anesthetic sparing, in contrast to a strong hypnotic effect in wild-type littermates.<sup>9</sup> In another study *in vivo*, acute knockdown of  $\alpha_{2A}$ -AR expression in the LC failed to affect dexmedetomidine-induced sedation.<sup>46</sup> These findings suggest that  $\alpha_{2A}$ -ARs on nonadrenergic neurons mediate their sedative effects. Furthermore, dopamine- $\beta$ -hydroxylase knockout mice that have no synaptic norepinephrine release show enhanced sensitivity to and delayed emergence from dexmedetomidine-induced hypnosis compared to wild-type mice.<sup>47</sup> This further supports the concept that norepinephrine release from LC neurons is not critical

for dexmedetomidine-induced hypnosis but rather supports a role for direct  $\alpha_2$ -AR agonist actions on nonadrenergic neurons in their sedative and anesthetic-sparing actions. Our findings demonstrate a presynaptic site of interaction between the volatile anesthetic isoflurane and the highly selective  $\alpha_2$ -AR agonist dexmedetomidine in reducing SV exocytosis by blocking  $\text{Ca}^{2+}$  influx in hippocampal neuron axon terminals, a mechanism previously implicated in the presynaptic anesthetic actions of volatile anesthetics.<sup>13,14</sup>

The role of presynaptic  $\alpha_2$ -AR agonist-mediated inhibition of neurotransmitter release from nonadrenergic neurons in specific anesthetic endpoints is compelling, but identification of the relevant neuronal networks involved will require further study. The hypnotic effects of  $\alpha_2$ -AR agonists were initially proposed to be mediated by presynaptic  $\alpha_{2A}$ -ARs on noradrenergic projections from the LC to mimic endogenous sleep mechanisms.<sup>45,48</sup> While indirect neurophysiologic studies *in vivo* continue to invoke this mechanism,<sup>49</sup> genetic studies provide strong evidence that nonadrenergic, not noradrenergic,  $\alpha_{2A}$ -ARs mediate the sedative, hypnotic, and anesthetic-sparing actions of  $\alpha_2$ -AR agonists.<sup>9,10,46,47</sup> Plausible targets for the hypnotic and anesthetic-sparing effects of  $\alpha_2$ -AR agonists include direct suppression of synaptic transmission in corticocortical<sup>3</sup> and thalamocortical networks.<sup>48,49</sup> A recent study *in vivo* using the TetTag-hM<sub>3</sub>D<sub>q</sub> system to record and reactivate neuronal groups activated by dexmedetomidine implicates the preoptic hypothalamus and neighboring dorsal structures in dexmedetomidine-induced sedation.<sup>46</sup>

Although our studies were conducted in hippocampal neurons and are therefore most directly relevant to the amnesic properties of the  $\alpha_2$ -AR agonist dexmedetomidine,<sup>50,51</sup> the effects observed involve fundamental mechanisms regulating SV exocytosis in all neurons.<sup>52</sup> Given the widespread expression of  $\alpha_{2A}$ -AR receptors,<sup>17,18</sup> this pharmacodynamic interaction is likely to apply throughout the central nervous system. Identification of the locations of the specific nonadrenergic  $\alpha_{2A}$ -ARs involved in the multiple neuropharmacologic endpoints essential for enhancing general anesthetic effects is critical to the development of more targeted agents with improved specificity and therefore safety. Modulation of synaptic transmission by  $\alpha_{2A}$ -ARs might also contribute to their emerging organoprotective effects, further augmenting their clinical utility by both reducing anesthetic doses and preserving organ function.<sup>53</sup>

## Acknowledgments

The authors thank Loren L. Looger, Ph.D., Janelia Research Campus, Howard Hughes Medical Institute, Ashburn, Virginia, and Yongling Zhu, Ph.D., Northwestern University, Chicago, Illinois, for generously providing plasmids. The authors also thank members of the Hemmings and Ryan laboratories (Weill Cornell Medical College, New York, New York) for constructive interactions and critical reading of the manuscript.

## Research Support

Supported by National Institutes of Health (Bethesda, Maryland) grant GM58055 (to Dr. Hemmings) and the Departments of Anesthesiology of Weill Cornell Medical College, New York, New York, and Kurume University School of Medicine, Kurume, Fukuoka, Japan.

## Competing Interests

Dr. Hemmings is an Editor of ANESTHESIOLOGY and of the *British Journal of Anesthesia*. The other authors declare no competing interests.

## Correspondence

Address correspondence to Dr. Hemmings: Weill Cornell Medical College, Department of Anesthesiology, Box 124, 1300 York Avenue, New York, New York. hchemmi@med.cornell.edu. Information on purchasing reprints may be found at [www.anesthesiology.org](http://www.anesthesiology.org) or on the masthead page at the beginning of this issue. ANESTHESIOLOGY's articles are made freely accessible to all readers, for personal use only, 6 months from the cover date of the issue.

## References

- Hemmings HC Jr, Akabas MH, Goldstein PA, Trudell JR, Orser BA, Harrison NL: Emerging molecular mechanisms of general anesthetic action. *Trends Pharmacol Sci* 2005; 26:503–10
- Hudetz AG: General anesthesia and human brain connectivity. *Brain Connect* 2012; 2:291–302
- Alkire MT, Hudetz AG, Tononi G: Consciousness and anesthesia. *Science* 2008; 322:876–80
- Franks NP: General anaesthesia: From molecular targets to neuronal pathways of sleep and arousal. *Nat Rev Neurosci* 2008; 9:370–86
- Segal IS, Vickery RG, Walton JK, Doze VA, Maze M: Dexmedetomidine diminishes halothane anesthetic requirements in rats through a postsynaptic alpha 2 adrenergic receptor. *ANESTHESIOLOGY* 1988; 69:818–23
- Lakhlani PP, MacMillan LB, Guo TZ, McCool BA, Lovinger DM, Maze M, Limbird LE: Substitution of a mutant alpha2a-adrenergic receptor *via* “hit and run” gene targeting reveals the role of this subtype in sedative, analgesic, and anesthetic-sparing responses *in vivo*. *Proc Natl Acad Sci USA* 1997; 94:9950–5
- Giltsbach R, Hein L: Presynaptic metabotropic receptors for acetylcholine and adrenaline/noradrenaline. *Handb Exp Pharmacol* 2008; 184:261–88
- Correa-Sales C, Rabin BC, Maze M: A hypnotic response to dexmedetomidine, an alpha 2 agonist, is mediated in the locus coeruleus in rats. *ANESTHESIOLOGY* 1992; 76:948–52
- Giltsbach R, Röser C, Beetz N, Brede M, Hadamek K, Haubold M, Leemhuis J, Philipp M, Schneider J, Urbanski M, Szabo B, Weinshenker D, Hein L: Genetic dissection of alpha2-adrenoceptor functions in adrenergic *versus* nonadrenergic cells. *Mol Pharmacol* 2009; 75:1160–70
- Giltsbach R, Hein L: Are the pharmacology and physiology of  $\alpha_2$  adrenoceptors determined by  $\alpha_2$ -heteroreceptors and autoreceptors respectively? *Br J Pharmacol* 2012; 165:90–102
- Westphalen RI, Hemmings HC Jr: Volatile anesthetic effects on glutamate *versus* GABA release from isolated rat cortical nerve terminals: 4-Aminopyridine-evoked release. *J Pharmacol Exp Ther* 2006; 316:216–23
- Westphalen RI, Desai KM, Hemmings HC Jr: Presynaptic inhibition of the release of multiple major central nervous system neurotransmitter types by the inhaled anaesthetic isoflurane. *Br J Anaesth* 2013; 110:592–9

13. Hemmings HC, Yan W, Westphalen RI, Ryan TA: The general anesthetic isoflurane depresses synaptic vesicle exocytosis. *Mol Pharmacol* 2005; 67:1591–9
14. Baumgart JP, Zhou ZY, Hara M, Cook DC, Hoppa MB, Ryan TA, Hemmings HC Jr: Isoflurane inhibits synaptic vesicle exocytosis through reduced Ca<sup>2+</sup> influx, not Ca<sup>2+</sup>-exocytosis coupling. *Proc Natl Acad Sci USA* 2015; 112:11959–64
15. Scholz J, Tonner PH: Alpha2-adrenoceptor agonists in anaesthesia: A new paradigm. *Curr Opin Anaesthesiol* 2000; 13:437–42
16. MacIver MB: Anesthetic agent-specific effects on synaptic inhibition. *Anesth Analg* 2014; 119:558–69
17. Nicholas AP, Pieribone V, Hökfelt T: Distributions of mRNAs for alpha-2 adrenergic receptor subtypes in rat brain: An *in situ* hybridization study. *J Comp Neurol* 1993; 328:575–94
18. Winzer-Serhan UH, Raymon HK, Broide RS, Chen Y, Leslie FM: Expression of alpha 2 adrenoceptors during rat brain development—I. Alpha 2A messenger RNA expression. *Neuroscience* 1997; 76:241–60
19. Milner TA, Lee A, Aicher SA, Rosin DL: Hippocampal alpha2a-adrenergic receptors are located predominantly presynaptically but are also found postsynaptically and in selective astrocytes. *J Comp Neurol* 1998; 395:310–27
20. Shields AD, Wang Q, Winder DG: Alpha2A-adrenergic receptors heterosynaptically regulate glutamatergic transmission in the bed nucleus of the stria terminalis. *Neuroscience* 2009; 163:339–51
21. Nakamura M, Suk K, Lee MG, Jang IS:  $\alpha(2A)$  adrenoceptor-mediated presynaptic inhibition of GABAergic transmission in rat tuberomammillary nucleus neurons. *J Neurochem* 2013; 125:832–42
22. Sankaranarayanan S, Ryan TA: Real-time measurements of vesicle-SNARE recycling in synapses of the central nervous system. *Nat Cell Biol* 2000; 2:197–204
23. Kim SH, Ryan TA: CDK5 serves as a major control point in neurotransmitter release. *Neuron* 2010; 67:797–809
24. Chen TW, Wardill TJ, Sun Y, Pulver SR, Renninger SL, Baohan A, Schreier ER, Kerr RA, Orger MB, Jayaraman V, Looger LL, Svoboda K, Kim DS: Ultrasensitive fluorescent proteins for imaging neuronal activity. *Nature* 2013; 499:295–300
25. Taheri S, Halsey MJ, Liu J, Eger EI II, Koblin DD, Laster MJ: What solvent best represents the site of action of inhaled anesthetics in humans, rats, and dogs? *Anesth Analg* 1991; 72:627–34
26. Ratnakumari L, Hemmings HC Jr: Inhibition of presynaptic sodium channels by halothane. *ANESTHESIOLOGY* 1998; 88:1043–54
27. Kavalali ET, Jorgensen EM: Visualizing presynaptic function. *Nat Neurosci* 2014; 17:10–6
28. Brum PC, Hurt CM, Shcherbakova OG, Kobilka B, Angelotti T: Differential targeting and function of alpha2A and alpha2C adrenergic receptor subtypes in cultured sympathetic neurons. *Neuropharmacology* 2006; 51:397–413
29. Starke K: Presynaptic autoreceptors in the third decade: Focus on alpha2-adrenoceptors. *J Neurochem* 2001; 78:685–93
30. Hirning LD, Fox AP, McCleskey EW, Olivera BM, Thayer SA, Miller RJ, Tsien RW: Dominant role of N-type Ca<sup>2+</sup> channels in evoked release of norepinephrine from sympathetic neurons. *Science* 1988; 239:57–61
31. Boehm S, Huck S: Inhibition of N-type calcium channels: The only mechanism by which presynaptic alpha 2-autoreceptors control sympathetic transmitter release. *Eur J Neurosci* 1996; 8:1924–31
32. Wheeler DB, Randall A, Tsien RW: Roles of N-type and Q-type Ca<sup>2+</sup> channels in supporting hippocampal synaptic transmission. *Science* 1994; 264:107–11
33. Reuter H: Measurements of exocytosis from single presynaptic nerve terminals reveal heterogeneous inhibition by Ca(2+)-channel blockers. *Neuron* 1995; 14:773–9
34. Wu LG, Saggau P: Pharmacological identification of two types of presynaptic voltage-dependent calcium channels at CA3-CA1 synapses of the hippocampus. *J Neurosci* 1994; 14:5613–22
35. Ariel P, Hoppa MB, Ryan TA: Intrinsic variability in Pv, RRP size, Ca(2+) channel repertoire, and presynaptic potentiation in individual synaptic boutons. *Front Synaptic Neurosci* 2012; 4:9
36. Sanders RD, Maze M: Noradrenergic trespass in anesthetic and sedative states. *ANESTHESIOLOGY* 2012; 117:945–7
37. Aantaa R, Jaakola ML, Kallio A, Kanto J: Reduction of the minimum alveolar concentration of isoflurane by dexmedetomidine. *ANESTHESIOLOGY* 1997; 86:1055–60.
38. Takamatsu I, Iwase A, Ozaki M, Kazama T, Wada K, Sekiguchi M: Dexmedetomidine reduces long-term potentiation in mouse hippocampus. *ANESTHESIOLOGY* 2008; 108:94–102
39. Ribeiro PO, Antunes LM, Nunes CS, Silva HB, Cunha RA, Tomé ÂR: The Effects of different concentrations of the  $\alpha$ 2-adrenoceptor agonist medetomidine on basal excitatory synaptic transmission and synaptic plasticity in hippocampal slices of adult mice. *Anesth Analg* 2015; 120:1130–7
40. Herold KF, Hemmings HC: Sodium channels as targets for volatile anesthetics. *Front Pharmacol* 2012; 3:1–7
41. Gilsbach R, Piekorz RP, Pexa K, Beetz N, Schneider J, Nu B, Birnbaumer L, Hein L: Modulation of  $\alpha$ 2-adrenoceptor functions by heterotrimeric G $\alpha$ i protein isoforms. *J Pharmacol Exp Ther* 2009; 331:35–44
42. DeBock F, Kurz J, Azad SC, Parsons CG, Hapfelmeier G, Zieglgänsberger W, Rammes G: Alpha2-adrenoreceptor activation inhibits LTP and LTD in the basolateral amygdala: Involvement of Gi/o-protein-mediated modulation of Ca<sup>2+</sup>-channels and inwardly rectifying K<sup>+</sup>-channels in LTD. *Eur J Neurosci* 2003; 17:1411–24
43. Gu XY, Liu BL, Zang KK, Yang L, Xu H, Pan HL, Zhao ZQ, Zhang YQ: Dexmedetomidine inhibits tetrodotoxin-resistant Nav1.8 sodium channel activity through Gi/o-dependent pathway in rat dorsal root ganglion neurons. *Mol Brain* 2015; 8:15
44. Hoppa MB, Gouzer G, Armbruster M, Ryan TA: Control and plasticity of the presynaptic action potential waveform at small CNS nerve terminals. *Neuron* 2014; 84:778–89
45. Nelson LE, Lu J, Guo T, Saper CB, Franks NP, Maze M: The alpha2-adrenoceptor agonist dexmedetomidine converges on an endogenous sleep-promoting pathway to exert its sedative effects. *ANESTHESIOLOGY* 2003; 98:428–36
46. Zhang Z, Ferretti V, Güntan İ, Moro A, Steinberg EA, Ye Z, Zecharia AY, Yu X, Vyssotski AL, Brickley SG, Yustos R, Pillidge ZE, Harding EC, Wisden W, Franks NP: Neuronal ensembles sufficient for recovery sleep and the sedative actions of  $\alpha$ 2 adrenergic agonists. *Nat Neurosci* 2015; 18:553–61
47. Hu FY, Hanna GM, Han W, Mardini F, Thomas SA, Wyner AJ, Kelz MB: Hypnotic hypersensitivity to volatile anesthetics and dexmedetomidine in dopamine  $\beta$ -hydroxylase knockout mice. *ANESTHESIOLOGY* 2012; 117:1006–17
48. Huupponen E, Maksimow A, Lapinlampi P, Särkelä M, Saastamoinen A, Snapir A, Scheinin H, Scheinin M, Meriläinen P, Himanen SL, Jääskeläinen S: Electroencephalogram spindle activity during dexmedetomidine sedation and physiological sleep. *Acta Anaesthesiol Scand* 2008; 52:289–94
49. Akeju O, Loggia ML, Catana C, Pavone KJ, Vazquez R, Rhee J, Contreras Ramirez V, Chonde DB, Izquierdo-Garcia D, Arabasz G, Hsu S, Habeeb K, Hooker JM, Napadow V, Brown EN, Purdon PL: Disruption of thalamic functional connectivity is a neural correlate of dexmedetomidine-induced unconsciousness. *Elife* 2014; 3:e04499
50. Pryor KO, Reinsel RA, Mehta M, Li Y, Wixted JT, Veselis RA: Visual P2-N2 complex and arousal at the time of encoding predict the time domain characteristics of amnesia for multiple



intravenous anesthetic drugs in humans. *ANESTHESIOLOGY* 2010; 113:313–26

51. Hayama HR, Drumheller KM, Mastro Monaco M, Reist C, Cahill LF, Alkire MT: Event-related functional magnetic resonance imaging of a low dose of dexmedetomidine that impairs long-term memory. *ANESTHESIOLOGY* 2012; 117:981–95
52. Dittman J, Ryan TA: Molecular circuitry of endocytosis at nerve terminals. *Annu Rev Cell Dev Biol* 2009; 25:133–60
53. Sanders RD, Xu J, Shu Y, Januszewski A, Halder S, Fidalgo A, Sun P, Hossain M, Ma D, Maze M: Dexmedetomidine attenuates isoflurane-induced neurocognitive impairment in neonatal rats. *ANESTHESIOLOGY* 2009; 110:1077–85

## ANESTHESIOLOGY REFLECTIONS FROM THE WOOD LIBRARY-MUSEUM

### From Chloroform to Thalia and Erato, Liebig's Muses of Comedy and Love Poetry

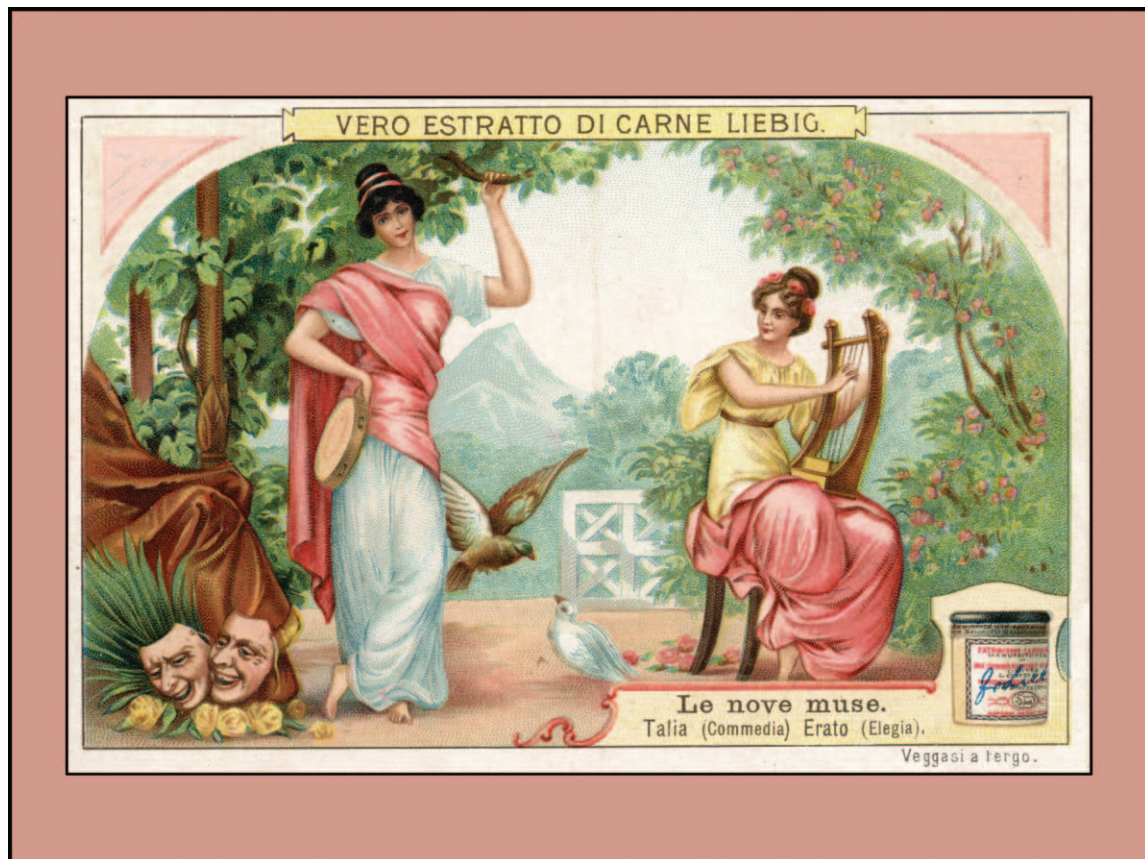

Instead of dance, Erato (“beloved”) governed romance as the Muse of Love Poetry. On this Italian card advertising a company cofounded by chloroform pioneer Justus von Liebig (1803 to 1873), a seated Erato (*right*) is pictured playing the cithara, the musical and etymological precursor to today’s guitar. If a 20th-century actor portrayed Erato poorly, that thespian often “got the hook” and was dragged offstage. That hook represented the shepherd’s crook of Thalia (“blooming”), the Muse of Comedy and Bucolic Poetry. Thalia (*left*) was frequently depicted as here, holding a tambourine or drum and standing near her iconic mask(s) of comedy. (Copyright © the American Society of Anesthesiologists’ Wood Library-Museum of Anesthesiology.)

George S. Bause, M.D., M.P.H., Honorary Curator, ASA’s Wood Library-Museum of Anesthesiology, Schaumburg, Illinois, and Clinical Associate Professor, Case Western Reserve University, Cleveland, Ohio. UJYC@aol.com.
